# Probabilistic programming: a powerful new approach to statistical phylogenetics

Fredrik Ronquist<sup>1†\*</sup>, Jan Kudlicka<sup>2†</sup>, Viktor Senderov<sup>1†</sup>, Johannes Borgström<sup>2</sup>, Nicolas Lartillot<sup>3</sup>, Daniel Lundén<sup>4</sup>, Lawrence Murray<sup>5</sup>, Thomas B. Schön<sup>2</sup>, David Broman<sup>4</sup>

<sup>1</sup>Department of Bioinformatics and Genetics, Swedish Museum of Natural History, Box 50007, SE-104 05 Stockholm, Sweden

<sup>2</sup>Department of Information Technology, Uppsala University, Box 337, SE-751 05 Uppsala, Sweden

<sup>3</sup>Laboratoire de Biométrie et Biologie Evolutive, UMR CNRS 5558, Université Claude Bernard Lyon 1, FR-69622 Villeurbanne Cedex, France

<sup>4</sup>Department of Computer Science, KTH Royal Institute of Technology, SE-100 44 Stockholm, Sweden

<sup>5</sup>Uber AI, San Francisco CA 94105, United States

**Statistical phylogenetic analysis currently relies on complex, dedicated software packages, making it difficult for evolutionary biologists to explore new models and inference strategies. Recent years have seen more generic solutions based on probabilistic graphical models, but this formalism can only partly express phylogenetic problems. Here we show that universal probabilistic programming languages (PPLs) solve the model expression problem, while still supporting automated generation of efficient inference algorithms. To illustrate the power of the approach, we use it to generate sequential Monte Carlo (SMC) algorithms for recent biological diversification models that have been difficult to tackle using traditional approaches. This is the first time that SMC algorithms have been available for these models, and the first time it has been possible to compare them using model testing. Leveraging these advances, we re-examine previous claims about the performance of the models. Our work opens up several related problem domains to PPL approaches, and shows that few hurdles remain before PPLs can be effectively applied to the full range of phylogenetic models.**

In statistical phylogenetics, we are interested in learning the parameters of models where evolutionary trees—phylogenies—play an important part. Such analyses have a surprisingly wide range of applications across the life sciences<sup>1,2,3</sup>. In fact, the research front in many disciplines is partly defined today by our ability to learn the parameters of realistic phylogenetic models.

Statistical problems are often analyzed using generic modeling and inference tools. Not so in phylogenetics, where empiricists are largely dependent on dedicated software developed by small teams of computational biologists<sup>3</sup>. Even though these software packages have become increasingly flexible in recent years, empiricists are still limited to a large extent by predefined model spaces and inference strategies. Venturing outside these boundaries typically requires the help of skilled programmers and inference experts.

If it were possible to specify arbitrary phylogenetic models in an easy and intuitive way, and then automatically learn the latent variables (the unknown parameters) in them, the full creativity of the research community could be unleashed, significantly accelerating progress. There are two major hurdles standing in the way of such a vision. First, we must find a formalism (a language) that can express phylogenetic models in all their complexity, while still being easy to learn for empiricists (*the model expression problem*). Second, we need to be able to generate computationally efficient inference algorithms from such model descriptions, drawing from the full range of techniques available today (*the automated inference problem*).

In recent years, there has been significant progress towards solving the model expression problem by adopting the framework of probabilistic graphical models (PGMs)<sup>4,5</sup>.

PGMs can express many components of phylogenetic models in a structured way, so that efficient Markov chain Monte Carlo (MCMC) samplers—the current workhorse of Bayesian statistical phylogenetics—can be automatically generated for them. Other inference strategies are also readily applied to PGM components<sup>6,7</sup>.

Unfortunately, PGMs cannot express the core of phylogenetic models: the stochastic processes that generate the tree, and anything dependent on those processes. This is because the resulting evolutionary tree has variable topology, while a PGM expresses a fixed topology. It is possible to express the tree as a single stochastic variable within the PGM, but then the structure of this critical component of the model is opaque to the inference machinery. Hiding the tree inside a stochastic variable also means that it becomes impossible to describe relations between tree-generating processes and other model components, such as the rate of evolution, organism traits or biogeography.

Here, we show that the model expression problem can be solved using universal probabilistic programming languages (PPLs). PPLs have a long history in computer science<sup>8</sup>, but until recently they have been largely of academic interest because of the difficulty of generating efficient inference machinery when using such expressive languages. This is now changing rapidly thanks to improved methods of automated inference for PPLs<sup>9,10,11,12,13,14</sup>, and the increased interest in more flexible approaches to statistical modeling and analysis.

To demonstrate the potential of PPLs in statistical phylogenetics, we tackle a tough problem domain: models that accommodate variation across lineages in diversification rate. These include the recent ClaDS<sup>15</sup>, LSBDS<sup>16</sup> and BAMB<sup>17</sup> models, attracting considerable attention among evolutionary biologists despite the difficulties in developing good inference algorithms for them<sup>18</sup>.

\*E-mail: fredrik.ronquist@nrm.se

†F.R., J.K., and V.S. contributed equally to this work.

Using WebPPL—an easy-to-learn PPL<sup>9</sup>—and Birch—a language with a more efficient inference machinery<sup>14</sup>—we develop an effective encoding approach, and then automatically generate sequential Monte Carlo (SMC) algorithms based on short model descriptions ( $\sim 100$  lines of code each). This is the first time that powerful and flexible SMC algorithms have been available for these models, and the first asymptotically exact inference machinery for BAMM. It is also the first time that it has been possible to compare the models directly using Bayes factors. We end the paper by discussing a few problems, all seemingly tractable, which remain to be solved before PPLs can be used to address the full range of phylogenetic models. Solving them would facilitate the adoption of a wide range of novel inference strategies that have seen little or no use in phylogenetics before.

## Results

**Probabilistic programming.** Consider one of the simplest of all diversification models, constant rate birth-death (CRBD), in which lineages arise at a rate  $\lambda$  and die out at a rate  $\mu$ , giving rise to a phylogenetic tree  $\tau$ . Assume that we want to infer the values of  $\lambda$  and  $\mu$  given some phylogenetic tree  $\tau_{\text{obs}}$  of extant (now living) species that we have observed (or inferred from other data). In a Bayesian analysis, we would associate  $\lambda$  and  $\mu$  with prior distributions, and then learn their joint posterior probability distribution given the observed value of  $\tau$ .

Let us examine a PGM description of this model, say in RevBayes<sup>5</sup> (Listing 1). The first statement associates an observed tree with the variable `myTree`. The priors on `lambda` and `mu` are then specified, and it is stated that the tree variable `tau` is drawn from a birth-death process with parameters `lambda` and `mu` and generating a tree with leaves matching the taxa in `myTree`. Finally, `tau` is associated with ('clamped to') the observed value `myTree`.

### Listing 1: PGM description of the CRBD model

```

1 myTree = readTrees( "treefile.nex" )
2
3 lambda ~ dnGamma( 1, 1 )
4 mu ~ dnGamma( 1, 1 )
5
6 tau ~ dnBirthDeath( lambda, mu, myTree.taxa )
7 tau.clamp( myTree )

```

There is a one-to-one correspondence between these statements and elements in the PGM graph describing the conditional dependencies between the random variables in the model (Fig. 1). Given that the conditional densities `dnGamma` and `dnBirthDeath` are known analytically, along with good samplers, it is now straightforward to automatically generate standard inference algorithms for this problem, such as MCMC.

Unfortunately, a PGM cannot describe from first principles (elementary probability distributions) how the birth-death process produces a tree of extant species. The PGM has a fixed graph structure, while the probability of a surviving tree is an integral over many outcomes with varying topology. Specifically, the computation of `dnBirthDeath`

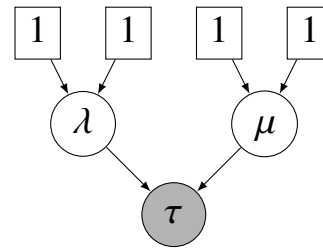

Figure 1: A probabilistic graphical model describing constant rate birth-death (CRBD). The square boxes are fixed nodes (parameters of the gamma distributions) and the circles are random variables. The shaded variable ( $\tau$ ) is observed, and  $(\lambda, \mu)$  are latent variables to be inferred.

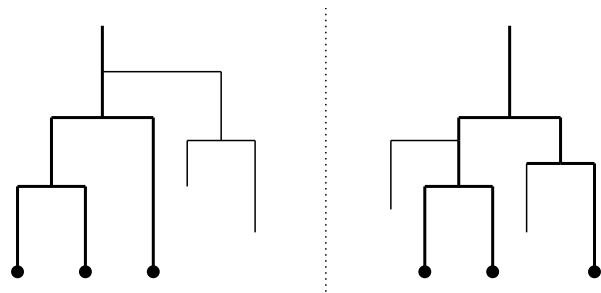

Figure 2: Two trees with extinct side branches (thin lines), each corresponding to the same observed phylogeny of extant species (thick lines). The trees illustrate just two examples of an infinite number of possible PGM expansions of the  $\tau$  node in Fig. 1.

requires integration over all possible ways in which the process could have generated side branches that eventually go extinct, each of these with a unique configuration of speciation and extinction events (Fig. 2). The integral must be computed by special-purpose code based on analytical or numerical solutions specific to the model. For the CRBD model, the integral is known analytically, but as soon as we start experimenting with more sophisticated diversification scenarios, as evolutionary biologists would want to do, computing the integral is likely to require dedicated numerical solvers, if it can be computed at all.

Universal PPLs solve the model expression problem by providing additional expressivity over PGMs. A PPL model description is essentially a simulation program (or generative model). Each time the program runs, it generates a different outcome. If it is executed an infinite number of times, we obtain a probability distribution over outcomes. The trick is to write a PPL program so that the distribution over outcomes corresponds to the posterior probability distribution of interest. This is straightforward if we understand how to simulate from the model, and how to insert the constraints given by the observed data.

Assume, for instance, that we are interested in computing the probability of survival and extinction under CRBD for specific values of  $\lambda$  and  $\mu$ , given that the process started at some time  $t$  in the past. We will pretend that we do not know the analytical solution to this problem; instead we will use a PPL to solve it. WebPPL<sup>9</sup> is an easy-to-learn PPL based on JavaScript, and we will use it here for illustrating

PPL concepts. WebPPL can be run in a web browser at <http://webppl.org> or installed locally (Supplementary Section 2). Like many PPLs, WebPPL has two special constructs that we will see in the following: (1) a **sample** statement, which specifies the prior distributions from which random variables are drawn; and (2) a **condition** statement, conditioning a random variable on an observation.

In WebPPL, we define a function `goesExtinct`, which takes the values of time, lambda and mu (Listing 2). It returns `true` if the process does not survive until the present (that is, goes extinct) and `false` otherwise (survives to the present).

Listing 2: Basic birth-death model simulation in WebPPL

```
1 var goesExtinct = function(time, lambda, mu) {
2   var waitingTime = sample(
3     Exponential({a: lambda + mu})
4   )
5
6   if (waitingTime > time) { return false }
7
8   var isSpeciation = sample(
9     Bernoulli({p: lambda / (lambda + mu)})
10  )
11
12  if (isSpeciation == false) { return true }
13
14  return goesExtinct(time - waitingTime, lambda, mu)
15  && goesExtinct(time - waitingTime, lambda, mu)
16 }
```

The function starts at some `time > 0` in the past. The `waitingTime` until the next event is drawn from an exponential distribution with rate `lambda + mu` and compared with `time`. If `waitingTime > time`, the function returns `false` (the process survived). Otherwise, we flip a coin (the Bernoulli distribution) to determine whether the next event is a speciation or an extinction event. If it is a speciation, the process continues by calling the same function recursively for each of the daughter lineages with the updated time `time - waitingTime`. Otherwise the function returns `true` (the lineage went extinct).

If executed many times, the `goesExtinct` function defines a probability distribution on the outcome space `{ true, false }` for specific values of  $t$ ,  $\lambda$  and  $\mu$ . To turn this into a Bayesian inference problem, let us associate  $\lambda$  and  $\mu$  with gamma priors, and then infer the posterior distribution of these parameters assuming that we have observed a group originating at time  $t = 10$  and surviving to the present. To do this, we combine the prior specifications and the conditioning on survival to the present with the `goesExtinct` function into a program that defines the distribution of interest (Listing 3).

Listing 3: CRBD model description in WebPPL

```
1 var model = function() {
2   var lambda = sample(
3     Gamma({shape: 1, scale: 1})
4   )
5   var mu = sample(
6     Gamma({shape: 1, scale: 1})
7   )
8   var t = 10
9
10  condition(goesExtinct(t, lambda, mu) == false)
```

```
11
12   return [lambda, mu]
13 }
```

Universal PPLs are by definition Turing-complete, that is, they have the same expressive power as most sophisticated programming languages used today. PGM-based systems lack expressions for stochastic branching (conditional `if-then-else` statements involving random variables) and unbounded recursion, such as the one used in the `goesExtinct` function above (Listing 2). If such constructs are provided by PGM-based software, they are only executed when the model is initiated; they are not part of the model description itself. Because of the popularity of PPLs in recent years, the term ‘probabilistic programming’ is now often used also for PGM-based languages, but here we reserve ‘probabilistic programming’ and ‘PPL’ for Turing-complete languages.

Inference in PPLs is typically supported by constructs that take a model description as input. Returning to the previous example, the joint posterior distribution is inferred by calling the built-in **Infer** function with the model, the desired inference algorithm, and the inference parameters as arguments (Listing 4).

Listing 4: Specifying inference strategy in WebPPL

```
1 Infer({model: model, method: 'SMC', particles:
2   10000})
```

To develop this example into a probabilistic program equivalent to the RevBayes model discussed previously (Listing 1), we need to describe the CRBD process along the observed tree, conditioning on all unobserved side branches going extinct (Supplementary Listings 2 and 3). The PPL specification of the CRBD inference problem is longer than the PGM specification because it does not use the analytical expression for the CRBD density. However, it exposes all the details of the diversification process, so it can be used as a template for exploring a wide variety of diversification models, while relying on the same inference machinery throughout. We will take advantage of this in the following.

**Diversification models.** The simplest model describing biological diversification is the Yule (pure birth) process<sup>19,20</sup>, in which lineages speciate at rate  $\lambda$  but never go extinct. For consistency, we will refer to it as constant rate birth (CRB). The CRBD model<sup>21</sup> discussed in the examples above adds extinction to the process, at a per-lineage rate of  $\mu$ .

An obvious extension of the CRBD model is to let the speciation and/or extinction rate vary over time instead of being constant<sup>22</sup>, referred to as the generalized birth-death process. Here, we will consider variation in birth rate over time, keeping turnover ( $\mu/\lambda$ ) constant, and we will refer to this as the time-dependent birth-death (TDBD) model, or the time-dependent birth (TDB) model when there is no extinction. Specifically, we will consider the function

$$\lambda(t) = \lambda_0 e^{z(t_0-t)},$$

where  $\lambda_0$  is the initial speciation rate at time  $t_0$ ,  $t$  is current time, and  $z$  determines the nature of the dependency. When

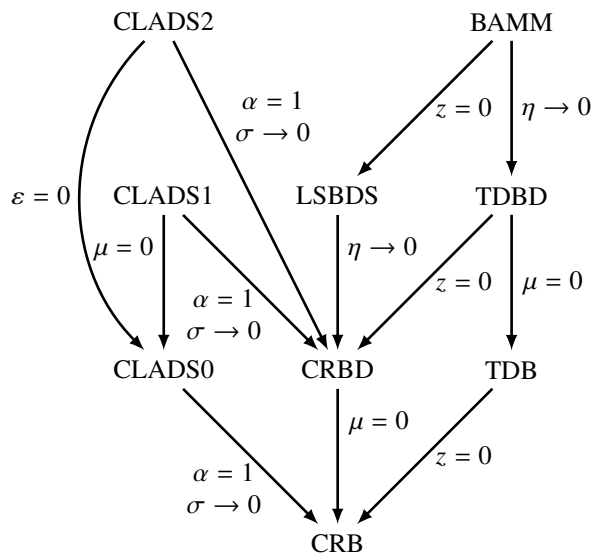

Figure 3: Relations between the diversification models considered in this paper.

$z > 0$ , the birth rate grows exponentially and the number of lineages explodes. The case  $z < 0$  is more interesting biologically; it corresponds to a niche-filling scenario. This is the idea that an increasing number of lineages leads to competition for resources and—all other things being equal—to a decrease in speciation rate. Other potential causes for slowing speciation rates over time have also been considered<sup>23</sup>.

The four basic diversification models—CRB, CRBD, TDB and TDBD—are tightly linked (Fig. 3). When  $z = 0$ , TDBD collapses to CRBD, and TDB to CRB. Similarly, when  $\mu = 0$ , CRBD becomes equivalent to CRB, and TDBD to TDB.

In recent years, there has been a spate of work on models that allow diversification rates to vary across lineages. Such models can accommodate diversification processes that gradually change over time. They can also explain sudden shifts in speciation or extinction rates, perhaps due to the origin of new traits or other factors that are specific to a lineage.

One of the first models of this kind to be proposed was Bayesian analysis of macroevolutionary mixtures (BAMM)<sup>17</sup>. The model is a lineage-specific, episodic TDBD model. A group starts out evolving under some TDBD process, with extinction ( $\mu$ ) rather than turnover ( $\epsilon$ ) being constant over time. A stochastic process running along the tree then changes the parameters of the TDBD process at specific points in time. Specifically,  $\lambda_0$ ,  $\mu$  and  $z$  are all redrawn from the priors at these switch points. In the original description, the switching process was defined in a statistically incoherent way<sup>18</sup>; here, we assume that the switches occur according to a Poisson process with rate  $\eta$ .

The BAMM model has been implemented in dedicated software using a combination of MCMC sampling and other numerical approximation methods<sup>17,24</sup>. The implementation has been criticized because it results in severely biased inference<sup>18</sup>. To date, it has not been possible to provide asymptotically exact inference machinery for BAMM.

In a recent contribution, a simplified version of BAMM was introduced: the lineage-specific birth-death-shift (LSBDS) model<sup>16</sup>. LSBDS is an episodic CRBD model, that is, it is equivalent to BAMM when  $z = 0$ . Inference machinery for the LSBDS model has been implemented in RevBayes<sup>5</sup> based on numerical integration over discretized prior distributions for  $\lambda$  and  $\mu$ , combined with MCMC. The computational complexity of this solution depends strongly on the number of discrete categories used. If  $k$  categories are used for both  $\lambda$  and  $\mu$ , computational complexity is multiplied by a factor  $k^2$ . Therefore, it is tempting to simplify the model. We note that, in the empirical LSBDS examples given so far,  $\mu$  is kept constant and only  $\lambda$  is allowed to change at switch points<sup>16</sup>. When  $z = 0$ , BAMM collapses to LSBDS, and when  $\eta \rightarrow 0$  it collapses to TDBD (Fig. 3). When  $\eta \rightarrow 0$ , LSBDS collapses to CRBD.

A different perspective is represented by the cladogenetic diversification rate shift (ClaDS) models<sup>15</sup>. They map diversification rate changes to speciation events, assuming that diversification rates change in small steps over the entire tree. After speciation, each descendant lineage inherits its initial speciation rate  $\lambda_i$  from the ending speciation rate  $\lambda_a$  of its ancestor through a mechanism that includes both a deterministic long-term trend and a stochastic effect. Specifically,

$$\log \lambda_i \sim \mathcal{N}(\log(\alpha \lambda_a), \sigma^2).$$

The  $\alpha$  parameter determines the long-term trend, and its effects are similar to the  $z$  parameter of TDBD and BAMM. When  $\alpha < 1$ , that is,  $\log \alpha < 0$ , the speciation rate decreases over time, corresponding to  $z < 0$ . The standard deviation  $\sigma$  determines the noise component. The larger the value, the more stochastic fluctuation there will be in speciation rates.

There are three different versions of ClaDS, characterized by how they model  $\mu$ . In ClaDS0, there is no extinction, that is,  $\mu = 0$ . In ClaDS1, there is a constant extinction rate  $\mu$  throughout the tree. Finally, in ClaDS2, it is the turnover rate  $\epsilon = \mu/\lambda$  that is kept constant over the tree. All ClaDS models collapse to CRB or CRBD models when  $\alpha = 1$  and  $\sigma \rightarrow 0$  (Fig. 3). The ClaDS models are implemented in the R package RPANDA<sup>25</sup>, using a combination of advanced numerical solvers and MCMC simulation<sup>15</sup>.

In contrast to previous work, where these models are implemented independently in complex software packages, We used PPL model descriptions (100 lines of code each) to generate efficient and asymptotically correct inference machinery for *all* diversification models described above. This machinery relies on sophisticated Monte Carlo algorithms which, unlike classical MCMC, can also estimate the marginal likelihood (the normalization constant of Bayes theorem). We then compared the performance of the different diversification models on empirical data by inferring the posterior distribution over the parameters of interest and by conducting model comparison based on the marginal likelihood (Bayes factors). Specifically, we implemented the CRB, CRBD, TDB, TDBD, BAMM, LSBDS, ClaDS0, ClaDS1 and ClaDS2 models in WebPPL and Birch. The model descriptions are provided at <https://github.com/phypp1/probabilistic-programming>. They are simi-

lar in structure to the CRBD program presented above.

**Inference strategies.** We used inference algorithms in the SMC family, an option available in both WebPPL and Birch. An SMC algorithm runs many simulations (called particles) in parallel, and stops them when some new information, like the time of a speciation event or extinction of a side lineage, becomes available. At such points, the particles are subjected to *resampling*, that is, sampling (with replacement) based on their likelihoods. SMC algorithms work particularly well when the model can be written such that the information derived from observed data can successively be brought to bear on the likelihood of a particle during the simulation. This is the case when simulating a diversification process along a tree of extant taxa, because we know that each ‘hidden’ speciation event must eventually result in extinction of the unobserved side lineage. That is, we can condition the simulation on extinction of the side branches that arise (Supplementary Listing 3). Similarly, we can condition the simulation on the times of the speciation events leading to extant taxa.

Despite this, standard SMC (the bootstrap particle filter) remains relatively inefficient for these models. Therefore, we employed three new PPL inference techniques that we developed or extended as part of this study: alignment<sup>26</sup>, delayed sampling<sup>13</sup> and the alive particle filter<sup>27</sup> (see Methods).

**Empirical results.** To demonstrate the power of the approach, we applied PPLs to compare the performance of the nine diversification models discussed above for 40 bird clades (see Methods and Supplementary Table 5). The results (Supplementary Figs. 12–21) are well summarized by the four cases represented in Fig. 4. Focusing on marginal likelihoods (top row), we observe that the simplest models (CRB, CRBD), without any variation through time or between lineages, provide an adequate description of the diversification process for around 40% of the trees (Fig. 4a). In the remaining clades, there is almost universal support for slowing diversification rates over time. Occasionally, this is not accompanied by strong evidence for lineage-specific effects (Fig. 4b) but usually it is (Figs. 4c and d). In the latter case, the ClaDS models always show higher marginal likelihoods than BMM and LSBDS, and this even for trees on which the latter do detect rate shifts (Fig. 4d). Interestingly, ClaDS2 rarely outperforms ClaDS0, which assumes no extinction. More generally, models assuming no extinction often have a higher marginal likelihood than their counterparts allowing for it.

The parameter estimates (Fig. 4, rows 2–6) show the conservative nature of the Bayes factor tests, driven by the relatively vague priors we chose on the additional parameters of the more complex models (Supplementary Fig. 2). However, even when complex models are marginally worse than simple or no-extinction models, there is evidence of the kind of variation they allow. For instance, the posterior distributions on  $z$  and  $\log \alpha$  suggest that negative time-dependence is quite generally present. Similarly, more sophisticated models usually detect low levels of extinction when they are outperformed by extinction-free counterparts. For a more

extensive discussion of these and other results, see Supplementary Section 9.

## Discussion

Universal PPLs provide Turing-complete languages for model descriptions, which guarantees that virtually all interesting phylogenetic models can be expressed. The expressiveness of PPLs is liberating for empiricists but it forces statisticians and computer scientists to approach the inference problem from a more abstract perspective. This can be challenging but also rewarding, as inference techniques for PPLs are so broadly applicable. Importantly, expressing phylogenetic models as PPLs opens up the possibility to apply a wide range of inference strategies developed for scientific problems with no direct relation to phylogenetics. Another benefit is that PPLs reduce the amount of manually written code for a particular inference problem, facilitating the task and minimizing the risk of inadvertently introducing errors, biases or inaccuracies. Our verification experiments (Supplementary Section 7) suggest that the light-weight PPL implementations of ClaDS1 and ClaDS2 provide more accurate computation of likelihoods than the thousands of lines of code developed originally for these models.

Previous discussion on the relative merits of diversification models have centered around the results of simulations and arguments over biological realism<sup>17,18,29,15,16</sup>, and it has been complicated by the lack of asymptotically correct inference machinery for BMM<sup>18,29</sup>. Our most important contribution in this context is the refinement of PPL techniques so that it is now possible to implement correct and efficient parameter inference under a wide range of diversification models, and to compare their performance on real data using rigorous model testing procedures. The PPL analyses of bird clades confirm previous claims that the ClaDS models provide a better description of lineage-specific diversification than BMM<sup>15</sup>. Even when simpler models have higher likelihoods, the ClaDS models seem to pick up a consistent signal across clades of small, gradual changes in diversification rates. Like many previous studies<sup>30</sup>, our analyses provide little or no support for extinction rates above zero. This appears to be due in part to systematic biases in the sampling of the leaves in the observed trees<sup>31,32</sup>, a problem that could be addressed by extending our PPL model scripts (Supplementary Section 9.6). Such sampling biases may also partly explain the strong support for slowing diversification rates<sup>23</sup>. A fascinating question that is now open to investigation is whether there remains evidence of occasional major shifts in diversification rates once the small gradual changes have been accounted for, something that could be addressed by a model that combines ClaDS- and BMM-like features.

Our results show that PPLs can already now compete successfully with dedicated special-purpose software in several phylogenetic problem domains. Separately, we show how PPLs can be applied to models where diversification rates are dependent on observable traits of organisms (so-called state-dependent speciation and extinction models)<sup>27</sup>. Other problem domains that may benefit from the PPL approach already at this point include epidemiology<sup>33</sup>, host-parasite

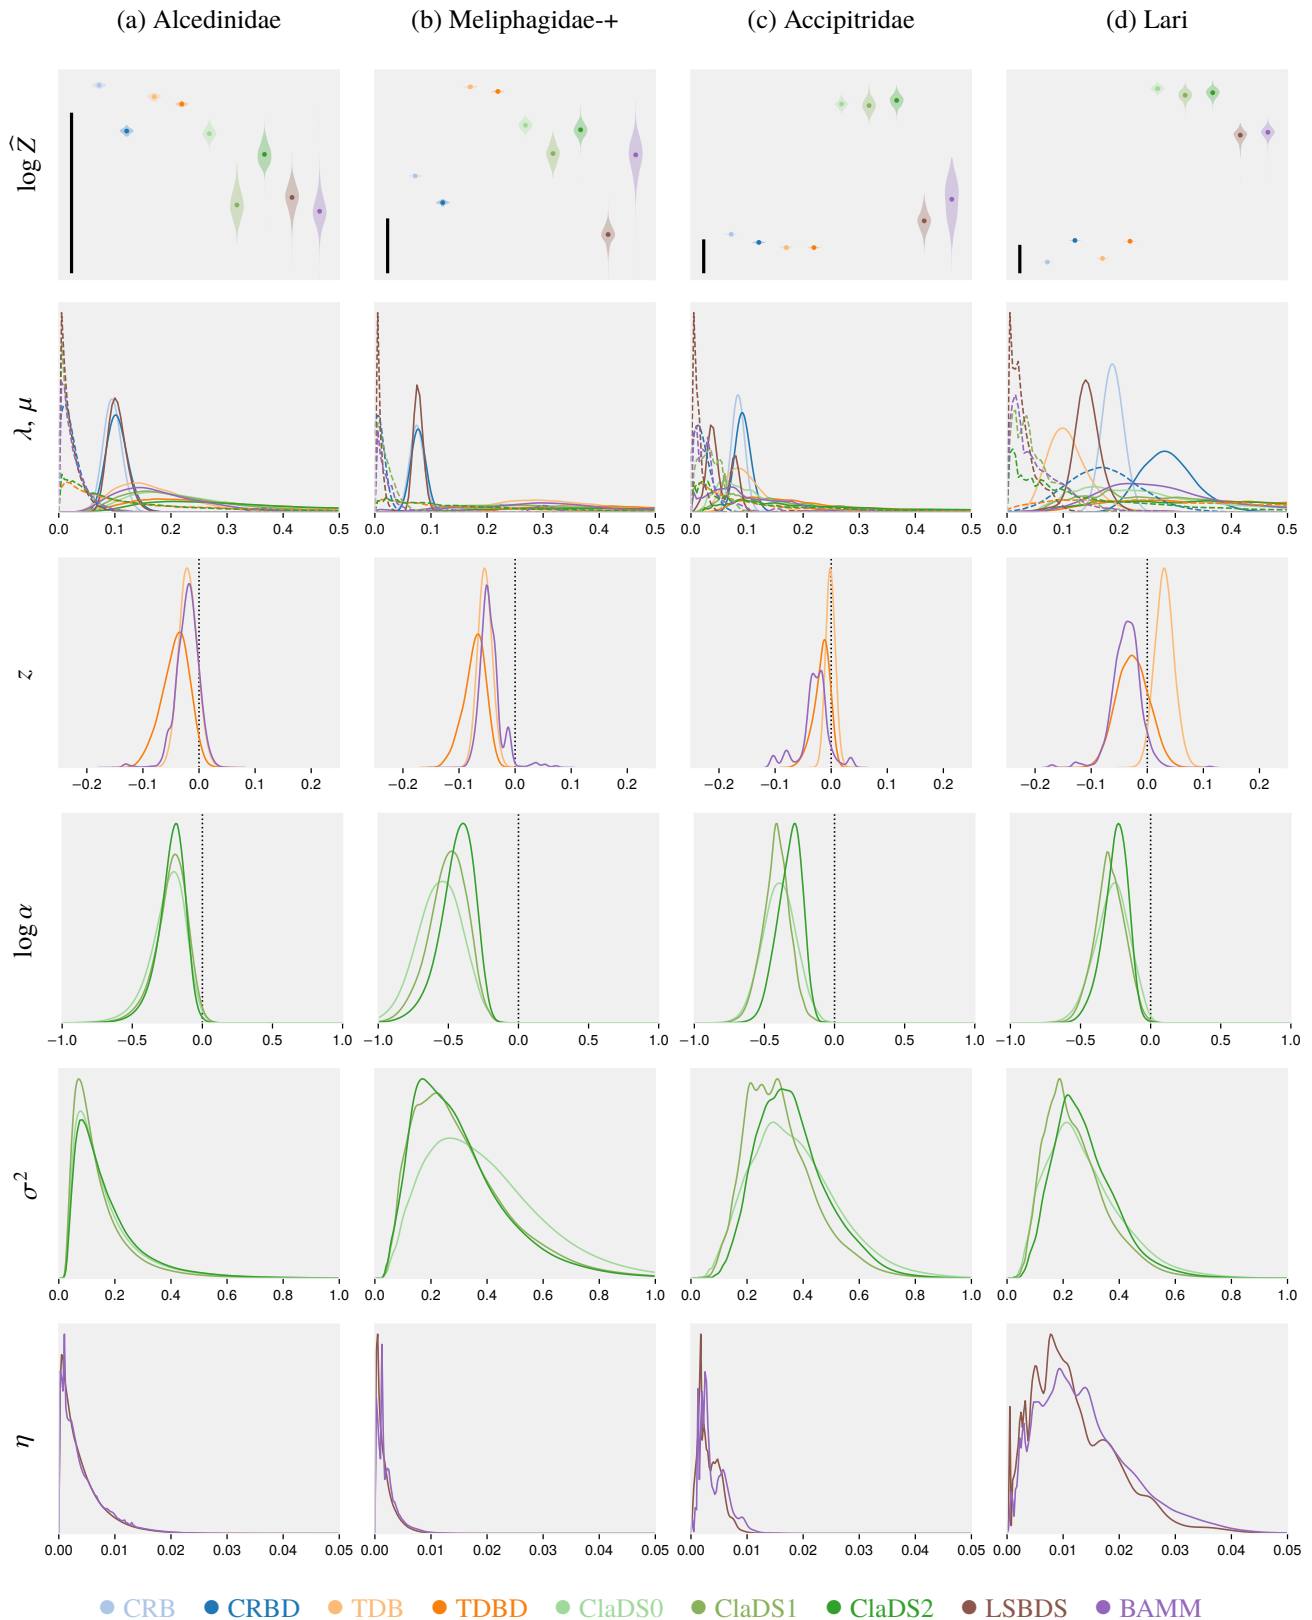

Figure 4: Comparison of diversification models for four bird clades exemplifying different patterns. **Alcedinidae**: simple models are adequate; **Meliphagidae+**: slowing diversification but no lineage-specific effects; **Accipitridae**: gradual (ClaDS) lineage-specific changes in diversification; and **Lari**: evidence for both gradual (ClaDS) and for punctuated (BAMM and LSBDS) lineage-specific changes in diversification. The upper plots show the marginal likelihoods ( $\log$  scale); a difference of 5 units (scale bar) is considered strong evidence in favor of the better model<sup>28</sup>. The remaining plots show estimated posterior distributions of model parameters. The  $\mu$  distributions are shown with dashed lines.

co-evolution<sup>34</sup>, and biogeography<sup>35,36,37,38</sup>.

What is missing before it becomes possible to generate efficient inference machinery for the full range of phylogenetic models from PPL descriptions? Assume, for instance, that we would like to do joint inference of phylogeny (from DNA sequence data) and diversification processes, instead of assuming that the extant tree is observed; this would seem to touch on all the major obstacles that remain. We then need to extend our current PPL models so that they also describe the nucleotide substitution process along the tree, and condition the simulation on the observed sequences. To generate the standard MCMC machinery for sampling across trees from such descriptions, delayed sampling needs to be extended to summarize over ancestral sequences (Felsenstein's pruning algorithm)<sup>39</sup>, and it should be applied statically through analysis of the script before the MCMC starts rather than dynamically. State-of-the-art MCMC algorithms for PPLs<sup>12</sup> must then be extended to generate computationally efficient tree samplers, such as stochastic nearest neighbour interchange<sup>40</sup>. To facilitate use of PPLs, we think it will also be important to provide a domain-specific PPL that is easy to use, while supporting both automatic state-of-the-art inference algorithms for phylogenetic problems as well as manual composition of novel inference strategies suited for this application domain. These all seem to be tractable problems, which we aim to address within the TreePPL project ([treeppl.org](http://treeppl.org)). We hope this paper will inspire readers to explore PPLs, and we invite computational biologists to join us in developing languages and inference strategies supporting this powerful new approach to statistical phylogenetics.

## Methods

**PPL software and model scripts.** All PPL analyses described here used WebPPL version 0.9.15, Node version 12.13.1<sup>9</sup> and the most recent development version of Birch (as of June 12, 2020)<sup>14</sup>. We implemented all models (CRB, CRBD, TDB, TDBD, ClaDS0, ClaDS1, ClaDS2, LSBDS and BAMB) as explicit simulation scripts that follow the structure of the CRBD example discussed in the main text (Supplementary Section 5). We also implemented compact simulations for the four simplest models (CRB, CRBD, TDB and TDBD) using the analytical equations for specific values of  $\lambda$ ,  $\mu$  and  $z$  to compute the probability of the observed trees.

In the PPL model descriptions, we account for incomplete sampling of the tips in the phylogeny based on the  $\rho$ -sampling model<sup>41</sup>. That is, each tip is assumed to be sampled with a probability  $\rho$ , which is specified a priori. To simplify the presentation in this paper, we always set  $\rho = 1$ . Arguably, this is the relevant setting for the empirical analyses, as the selected trees comprise all or nearly all extant species.

We standardized prior distributions across models to facilitate model comparisons (Supplementary Section 4, Fig. 2). To simplify the scripts, we simulated outcomes on ordered but unlabeled trees, and reweighted the particles so that the generated density was correct for labelled and unordered trees (Supplementary Section 3.2). We also developed an efficient simulation procedure to correct for sur-

ivorship bias, that is, the fact that we can only observe trees that survive until the present (Supplementary Section 5.3).

**Inference strategies.** To make SMC algorithms more efficient on diversification model scripts, we applied three new PPL inference techniques: alignment, delayed sampling, and the alive particle filter. *Alignment*<sup>26,42</sup> refers to the synchronization of resampling points across simulations (particles) in the SMC algorithm. The SMC algorithms previously used for PPLs automatically resample particles when they reach **observe** or **condition** statements. Diversification simulation scripts will have different numbers and placements of hidden speciation events on the surviving tree (Fig. 2), each associated with a **condition** statement in a naive script. Therefore, when particles are compared at resampling points, some may have processed a much larger part of the observed tree than others. Intuitively, one would expect the algorithm to perform better if the resampling points were aligned, such that the particles have processed the same portion of the tree when they are compared. This is indeed the case; alignment is particularly important for efficient inference on large trees (Supplementary Fig. 3). Alignment at code branching points (corresponding to observed speciation events in the diversification model scripts) can be generated automatically through static analysis of model scripts<sup>26</sup>. Here, we manually aligned the scripts by replacing the statements that normally trigger resampling with code that accumulate probabilities when they did not occur at the desired locations in the simulation (Supplementary Section 6.1).

*Delayed sampling*<sup>13</sup> is a technique that uses conjugacy to avoid sampling parameter values. For instance, the gamma distribution we used for  $\lambda$  and  $\mu$  is a conjugate prior to the Poisson distribution, describing the number of births or deaths expected to occur in a given time period. This means that we can marginalize out the rate, and simulate the number of events directly from its marginal (gamma-Poisson) distribution, without having to first draw a specific value of  $\lambda$  or  $\mu$ . In this way, a single particle can cover a portion of parameter space, rather than just single values of  $\lambda$  and  $\mu$ . Delayed sampling is only available in Birch; we extended it to cover all conjugacy relations relevant for the diversification models examined here.

The *alive particle filter*<sup>27</sup> is a technique for improving SMC algorithms when some particles can 'die' because their likelihood becomes zero. This happens when SMC is applied to diversification models because simulations that generate hidden side branches surviving to the present need to be discarded. The alive particle filter is a generic improvement on SMC, and it collapses to standard SMC with negligible overhead when no particles die. This improved version of SMC, inspired by state-dependent speciation-extinction models<sup>27</sup>, is only available in Birch.

**Verification.** To verify that the model scripts and the automatically generated inference algorithms are correct, we performed a series of tests focusing on the normalization constant (Supplementary Section 7). First, we checked that the model scripts for simple models (CRB(D) and TDB(D)) generated normalization constant estimates that were con-

sistent with analytically computed likelihoods for specific model parameter values (Supplementary Fig. 4). Second, we used the fact that all advanced diversification models (ClaDS0-2, LSBDS, BAMB) collapse to the CRBD model under specific conditions, and verified that we obtained the correct likelihoods for a range of parameter values (Supplementary Fig. 5). Third, we verified for the advanced models that the independently implemented model scripts and the inference algorithms generated for them by WebPPL and Birch, respectively, estimated the same normalization constant for a range of model parameter values (Supplementary Fig. 6). Fourth, we checked that our normalization constant estimates were consistent with the RPANDA package<sup>25,15</sup> for ClaDS0, ClaDS1, and ClaDS2, and with RevBayes for LSBDS<sup>5,16</sup>. For these tests, we had to develop specialized PPL scripts emulating the likelihood computations of RPANDA and RevBayes. The normalization constant estimates matched for LSBDS (Supplementary Fig. 8) and for ClaDS0 (Supplementary Fig. 7) but not for ClaDS1 and ClaDS2. Our best-effort interpretation at this point is that the PPL estimates for ClaDS1 and ClaDS2 are more accurate than those obtained from RPANDA (Supplementary Section 7.4). Finally, as there is no independent software that computes BAMB likelihoods correctly yet, we checked that our BAMB scripts gave the same normalization constant estimates as LSBDS under settings where the former collapses to the latter (Supplementary Fig. 9).

**Data.** We applied our PPL scripts to 40 bird clades derived from a previous analysis of divergence times and relationships among all bird species<sup>43</sup>. The selected clades are those with more than 50 species (range 54–316) after outgroups had been excluded (Supplementary Table 5). We followed the previous ClaDS2 analysis of these clades<sup>15</sup> in converting the time scale of the source trees to absolute time units. The clade ages range from 12.5 Ma to 66.6 Ma.

**Bayesian inference.** Based on JavaScript, WebPPL is comparatively slow, making it less useful for high-precision computation of normalization constants or estimation of posterior probability distributions using many particles. WebPPL is also less efficient than Birch because it does not yet support delayed sampling and the alive particle filter. Delayed sampling, in particular, substantially improves the quality of the posterior estimates obtained with a given number of particles. Therefore, we focused on Birch in computing normalization constants and posterior estimates for the bird clades.

For each tree, we ran the programs implementing the ClaDS, BAMB and LSBDS models using SMC with delayed sampling and the alive particle filter as the inference method. We used 5000 particles for all models except BAMB, for which we increased the number of particles to 20000. We ran each program 500 times and collected the estimates of  $\log \hat{Z}$  from each run together with the information needed to estimate the posterior distributions.

For CRB, CRBD, TDB and TDBD we exploited the closed form for the likelihood in the programs. We used sequential importance sampling with 10,000 particles as the inference method, and ran each program 50 times.

**Visualization.** Visualizations were prepared with Matplotlib<sup>44</sup>. We used the collected data from all runs to draw violin plots for  $\log \hat{Z}$  as well as the posterior distributions for  $\lambda$ ,  $\mu$  (for all models),  $z$  (for TDB, TDBD and BAMB),  $\log \alpha$  and  $\sigma^2$  (for the ClaDS models), and  $\eta$  (for LSBDS and BAMB). By virtue of delayed sampling, the posterior distributions for  $\lambda$  and  $\mu$  for all ClaDS models as well as BAMB and LSBDS were calculated as mixtures of gamma distributions, the posterior distribution for  $\log \alpha$  and  $\sigma^2$  for all ClaDS models as mixtures of normal inverse gamma and inverse gamma distributions, and the posterior distribution for  $\eta$  for BAMB and LSBDS as a mixture of gamma distributions. For the remaining model parameters, we used the kernel density estimation (KDE) method. Exact plot settings are provided in the code repository accompanying the paper.

**Reporting Summary** Further information on research design is available in the Nature Research Reporting Summary linked to this article.

## Data availability

The data used to compare the diversification models, together with full literature references, can be found at <https://github.com/phypppl/probabilistic-programming>, under the directory data.

## Code availability

The WebPPL and Birch models can be found in the same repository, <https://github.com/phypppl/probabilistic-programming>, under the directories webpppl and birch.

## References

1. Felsenstein, J. *Inferring Phylogenies* (Sinauer Associates, Sunderland, Massachusetts, 2003).
2. Yang, Z. *Molecular Evolution: A Statistical Approach* (Oxford University Press, Oxford, United Kingdom ; New York, NY, United States of America, 2014), 1 edition edition.
3. Nascimento, F. F., dos Reis, M. & Yang, Z. A biologist's guide to Bayesian phylogenetic analysis. *Nature Ecology & Evolution* **1**, 1446–1454 (2017).
4. Höhna, S. et al. Probabilistic graphical model representation in phylogenetics. *Systematic Biology* **63**, 753–771 (2014).
5. Höhna, S. et al. RevBayes: Bayesian phylogenetic inference using graphical models and an interactive model-specification language. *Systematic Biology* **65**, 726–736 (2016).
6. Fourment, M. & Darling, A. E. Evaluating probabilistic programming and fast variational Bayesian inference in phylogenetics. *PeerJ* **7**, e8272 (2019).



7. Bouchard-Côté, A. et al. Blang: Bayesian declarative modelling of arbitrary data structures. Preprint at <https://arxiv.org/abs/1912.10396> (2019).
8. Kozen, D. Semantics of probabilistic programs. In *20th Annual Symposium on Foundations of Computer Science*, pages 101–114 (San Juan, Puerto Rico, USA, 1979).
9. Goodman, N. D. & Stuhlmüller, A. The design and implementation of probabilistic programming languages. <http://dippl.org> (2014). Accessed: 2020-5-12.
10. Wood, F., Meent, J. W. & Mansinghka, V. A new approach to probabilistic programming inference. In *Proceedings of the Seventeenth International Conference on Artificial Intelligence and Statistics*, pages 1024–1032 (Reykjavik, Iceland, 2014).
11. Mansinghka, V., Selsam, D. & Perov, Y. Venture: a higher-order probabilistic programming platform with programmable inference. Preprint at <https://arxiv.org/abs/1404.0099> (2014).
12. Ritchie, D., Stuhlmüller, A. & Goodman, N. C3: Lightweight incrementalized MCMC for probabilistic programs using continuations and callsite caching. In *Proceedings of the 19th International Conference on Artificial Intelligence and Statistics*, pages 28–37 (Cadiz, Spain, 2016).
13. Murray, L. M., Lundén, D., Kudlicka, J., Broman, D. & Schön, T. B. Delayed sampling and automatic Rao–Blackwellization of probabilistic programs. In *Proceedings of the 21st International Conference on Artificial Intelligence and Statistics*, volume 21, page 10 (Lanzarote, 2018).
14. Murray, L. M. & Schön, T. B. Automated learning with a probabilistic programming language: Birch. *Annual Reviews in Control* **46**, 29–43 (2018).
15. Maliet, O., Hartig, F. & Morlon, H. A model with many small shifts for estimating species-specific diversification rates. *Nature Ecology & Evolution* **3**, 1086–1092 (2019).
16. Höhna, S. et al. A Bayesian approach for estimating branch-specific speciation and extinction rates. Preprint at <https://www.biorxiv.org/content/10.1101/555805v1> (2019).
17. Rabosky, D. L. Automatic detection of key innovations, rate shifts, and diversity-dependence on phylogenetic trees. *PLoS ONE* **9**, e89543 (2014).
18. Moore, B. R., Höhna, S., May, M. R., Rannala, B. & Huelsenbeck, J. P. Critically evaluating the theory and performance of Bayesian analysis of macroevolutionary mixtures. *Proceedings of the National Academy of Sciences of the United States of America* **113**, 9569–9574 (2016).
19. Yule, G. U. A mathematical theory of evolution, based on the conclusions of Dr. JC Willis, FRS. *Philosophical Transactions of the Royal Society of London. Series B, Containing Papers of a Biological Character* **213**, 21–87 (1924).
20. Nee, S. Birth-death models in macroevolution. *Annual Review of Ecology, Evolution and Systematics* **37**, 1–17 (2006).
21. Feller, W. Die Grundlagen der Volterraschen Theorie des Kampfes ums Dasein in wahrscheinlichkeitstheoretischer Behandlung. *Acta Biotheoretica* **5**, 11–40 (1939).
22. Kendall, D. G. On the generalized "birth-and-death" process. *The Annals of Mathematical Statistics* **19**, 1–15 (1948).
23. Moen, D. & Morlon, H. Why does diversification slow down? *Trends in Ecology & Evolution* **29**, 190–197 (2014).
24. Rabosky, D. L. et al. BAMMtools: an R package for the analysis of evolutionary dynamics on phylogenetic trees. *Methods in Ecology and Evolution* **5**, 701–707 (2014).
25. Morlon, H. et al. RPANDA: an R package for macroevolutionary analyses on phylogenetic trees. *Methods in Ecology and Evolution* **7**, 589–597 (2016).
26. Lundén, D., Broman, D., Ronquist, F. & Murray, L. M. Automatic alignment of sequential Monte Carlo inference in higher-order probabilistic programs. Preprint at <https://arxiv.org/abs/1812.07439> (2018).
27. Kudlicka, J., Murray, L. M., Ronquist, F. & Schön, T. B. Probabilistic programming for birth-death models of evolution using an alive particle filter with delayed sampling. In *Proceedings of the Conference on Uncertainty in Artificial Intelligence 2019*, volume 2019, page 11 (Tel Aviv, Israel, 2019).
28. Jeffreys, H. *The Theory of Probability* (Oxford University Press, Oxford, 1961).
29. Rabosky, D. L., Mitchell, J. S. & Chang, J. Is BAMM flawed? Theoretical and practical concerns in the analysis of multi-rate diversification models. *Systematic biology* **66**, 477–498 (2017).
30. Pyron, R. A. & Burbrink, F. T. Phylogenetic estimates of speciation and extinction rates for testing ecological and evolutionary hypotheses. *Trends in Ecology & Evolution* **28**, 729–736 (2013).
31. Höhna, S., Stadler, T., Ronquist, F. & Britton, T. Inferring speciation and extinction rates under different sampling schemes. *Molecular Biology and Evolution* **28**, 2577–2589 (2011).
32. Rosindell, J., Cornell, S. J., Hubbell, S. P. & Etienne, R. S. Protracted speciation revitalizes the neutral theory of biodiversity: Protracted speciation and neutral theory. *Ecology Letters* **13**, 716–727 (2010).

33. Baele, G., Dellicour, S., Suchard, M. A., Lemey, P. & Vrancken, B. Recent advances in computational phylogenetics. *Current Opinion in Virology* **31**, 24–32 (2018).
  34. Braga, M. P., Landis, M. J., Nylin, S., Janz, N. & Ronquist, F. Bayesian inference of ancestral host-parasite interactions under a phylogenetic model of host repertoire evolution. *Systematic Biology* **67**, 000–000 (Advance access) (2020).
  35. Ronquist, F. & Sanmartín, I. Phylogenetic methods in biogeography. *Annual Review of Ecology, Evolution, and Systematics* **42**, 441–464 (2011).
  36. Matzke, N. J. Model selection in historical biogeography reveals that founder-event speciation is a crucial process in island clades. *Systematic Biology* **63**, 951–970 (2014).
  37. Landis, M. J., Matzke, N. J., Moore, B. R. & Huelsenbeck, J. P. Bayesian analysis of biogeography when the number of areas is large. *Systematic Biology* **62**, 789–804 (2013).
  38. Ree, R. H. & Sanmartín, I. Conceptual and statistical problems with the DEC+J model of founder-event speciation and its comparison with DEC via model selection. *Journal of Biogeography* **45**, 741–749 (2018).
  39. Felsenstein, J. Evolutionary trees from DNA sequences: a maximum likelihood approach. *Journal of molecular evolution* **17**, 368–376 (1981).
  40. Lakner, C., van der Mark, P., Huelsenbeck, J. P., Larget, B. & Ronquist, F. Efficiency of Markov chain Monte Carlo tree proposals in Bayesian phylogenetics. *Systematic Biology* **57**, 86–103 (2008).
  41. Stadler, T. On incomplete sampling under birth-death models and connections to the sampling-based coalescent. *Journal of Theoretical Biology* **261**, 58–66 (2009).
  42. Lundén, D., Borgström, J. & Broman, D. Correctness of sequential Monte Carlo inference for probabilistic programming languages. Preprint at <https://arxiv.org/abs/2003.05191> (2020).
  43. Jetz, W., Thomas, G. H., Joy, J. B., Hartmann, K. & Mooers, A. O. The global diversity of birds in space and time. *Nature* **491**, 444–448 (2012).
  44. Hunter, J. D. Matplotlib: A 2d graphics environment. *Computing in Science & Engineering* **9**, 90–95 (2007).
- by the Swedish Foundation for Strategic Research (SSF) via the project *ASSEMBLE* (contract number: RIT15-0012) to T.S., D.B. and J.K., and by the European Union’s Horizon 2020 research and innovation program under the Marie Skłodowska-Curie grant agreement PhyPPL No 898120 to V.S. The computations were performed on resources provided by the Swedish National Infrastructure for Computing (SNIC) at the National Supercomputer Centre (NSC).

## Author contributions

F.R. and N.L. initiated the project. All authors contributed to the further development of concepts and algorithms. F.R., J.K. and V.S. implemented algorithms, supported by D.L., J.B., L.M., N.L., T.S. and D.B. Verification experiments and empirical analyses were run by J.K. and V.S., who also generated most of the illustrations assisted by D.L., F.R. and J.B. The final manuscript was a joint effort.

## Competing interests

The authors declare no competing interests.

## Additional information

**Supplementary information** for this paper is available at <https://github.com/phypppl/probabilistic-programming> under the directory supplementary.

**Correspondence and requests for materials** should be addressed to F.R., J.K. or V.S.

## Acknowledgements

We thank Lars Arvestad and Philippe Veber for their contributions to the early development of the ideas presented here, and Odile Maliet for extensive help with the RPANDA implementation of the ClaDS models. This work was supported by grants from the Swedish Research Council to J.B. and J.K. (No 2013-4853) and to F.R. (No 2018-04620),
